# Supplementary material for: Maternal Microbiota, Cortisol Concentration, and Post-Partum Weight Recovery Are Dependent on Mode of Delivery
Source: PubMed Central journal article supplement (PMC7353435; doi:10.3390/nu12061779), 2020-06-15
Supplement: nutrients-12-01779-s001.pdf [file nutrients-12-01779-s001.pdf]

**Table S1.** Characteristics of population participant in the post-partum weight retention study (n=167)

|                                                     | Weight retention study (n=167) |
|-----------------------------------------------------|--------------------------------|
| Weight gain (Kg)                                    | 12 [10-15]                     |
| Low                                                 | 58 (34.7)                      |
| Recommended                                         | 73 (43.7)                      |
| High                                                | 36 (21.6)                      |
| Pre-gestational BMI (Kg/m <sup>2</sup> )            | 22.31 [20.44-24.46]            |
| NP                                                  | 118 (70.65)                    |
| OW                                                  | 38 (22.8)                      |
| LW                                                  | 11 (6.6)                       |
| Antibiotic pregnancy (positive cases)               | 57 (33.9)                      |
| Gestational age (weeks)                             | 40 [39-40]                     |
| Delivery mode                                       |                                |
| Vaginal                                             | 111 (66.5)                     |
| Emergency C-section                                 | 25 (14.9)                      |
| Elective C-section                                  | 31 (18.5)                      |
| <b><i>Anthropometric data (maternal weight)</i></b> |                                |
| Pregestational (Kg)                                 | 60.50 [54.5-66]                |
| Delivery (Kg)                                       | 72 [67.5-80]                   |
| 7 days (Kg)                                         | 67.50 [61-73.88]               |
| 15 days (Kg)                                        | 65.7 [60-71.8]                 |
| 31 days (Kg)                                        | 64 [58-70.5]                   |
| 2 months (Kg)                                       | 63 [57.50-70.13]               |
| 4 months (Kg)                                       | 61.50 [56-69]                  |

Normally distributed data was presented as mean  $\pm$  SD and non-normal data as median [IQR]. Categorical variables were expressed as positive cases (percentage). In the case of microbiota study population, only a subset of participants had anthropometric data during post-partum period (n=40).

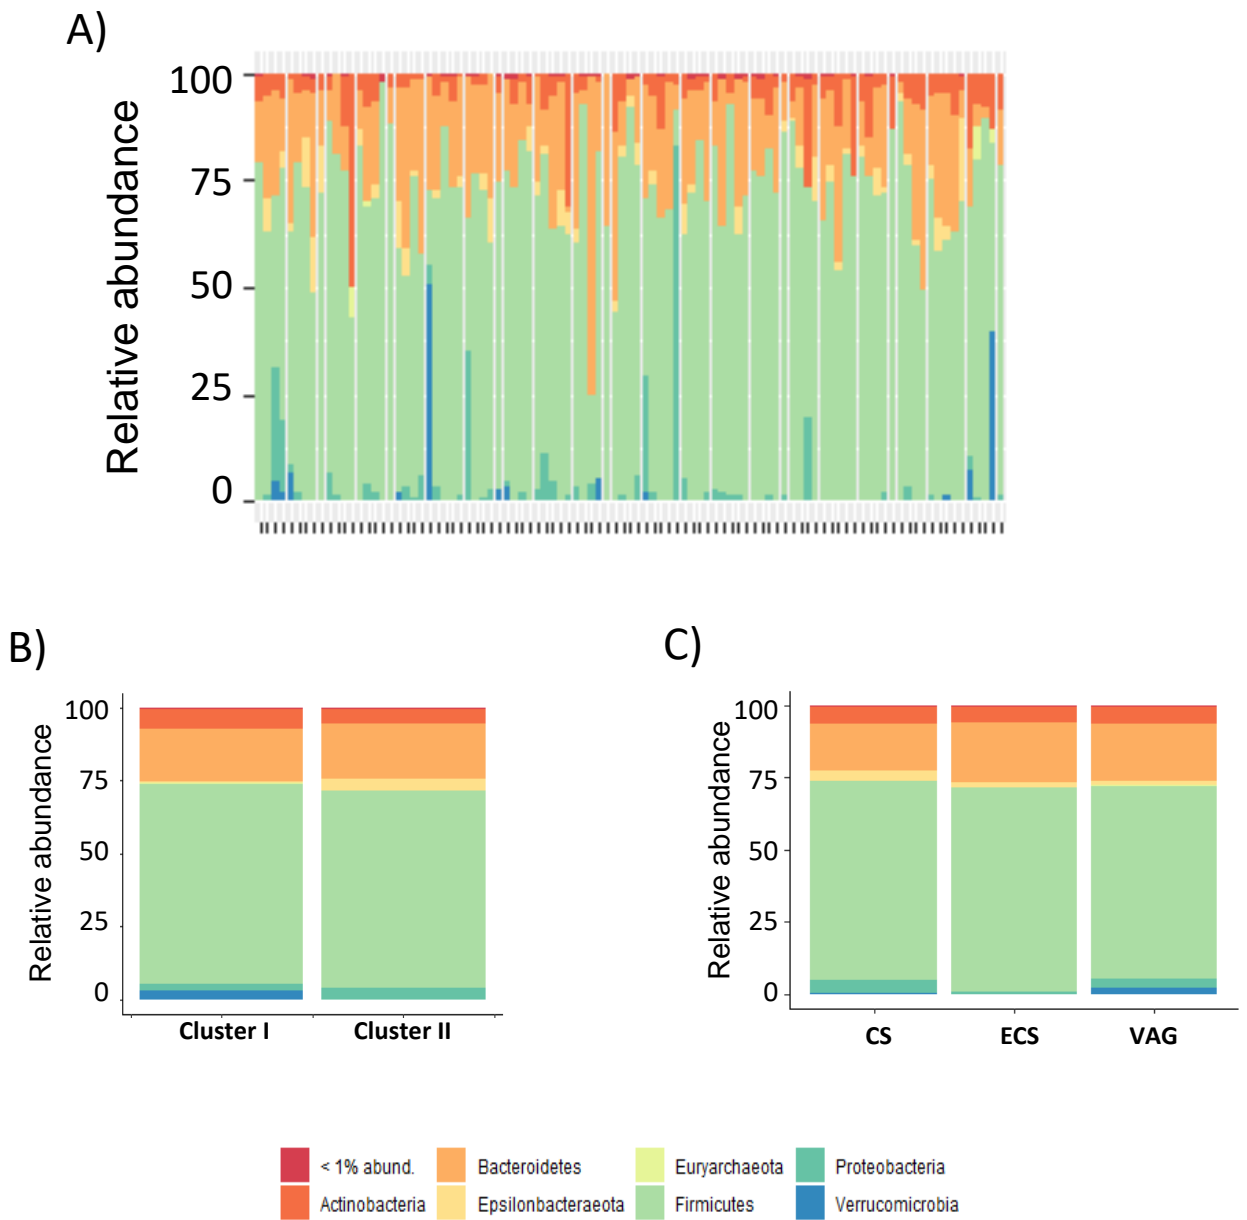

**Figure S1. Maternal microbiota composition at phylum level at delivery time.** Bar plot at phylum level of maternal microbiota according to individual (A), cluster (B) and delivery mode (C).

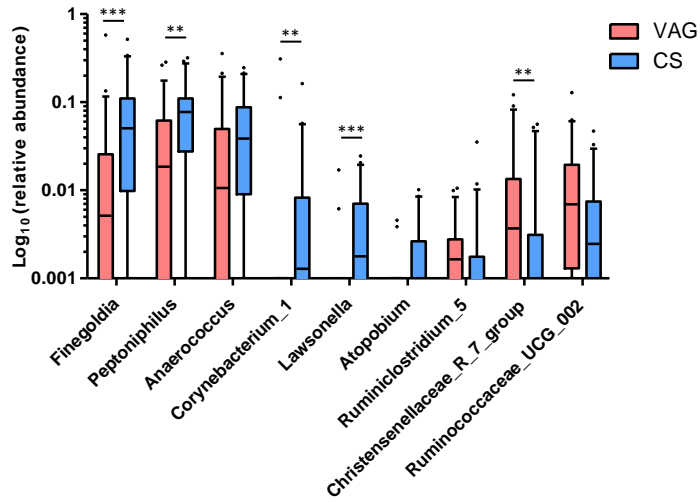

**Figure S2. Differences in maternal microbiota at delivery time according to delivery mode.** Boxplot of the main genera that marked the difference of maternal microbiota composition between delivery mode grouping both C-section modes. Data was transformed by log<sub>10</sub> of relative abundance of each genus for plotting. Whiskers represented 5-95 percentile interval. \* p<0.05, \*\* p<0.01, \*\*\* p<0.001.

**Table S2.** Occurrence of genera from maternal microbial core at delivery according to delivery mode.

| Taxa                                 | CS (%) | ECS (%) | VAG (%) |
|--------------------------------------|--------|---------|---------|
| <i>UBA1819</i>                       | 54     | 56      | 77      |
| <i>Subdoligranulum</i>               | 91     | 100     | 89      |
| <i>Streptococcus</i>                 | 91     | 100     | 91      |
| <i>S5A14a</i>                        | 57     | 67      | 51      |
| <i>Ruminococcus_2</i>                | 57     | 44      | 62      |
| <i>Ruminococcaceae_UCG014</i>        | 43     | 67      | 60      |
| <i>Ruminococcaceae_UCG013</i>        | 63     | 78      | 77      |
| <i>Ruminococcaceae_UCG005</i>        | 66     | 67      | 77      |
| <i>Ruminococcaceae_UCG004</i>        | 57     | 56      | 57      |
| <i>Ruminococcaceae_UCG003</i>        | 40     | 56      | 60      |
| <i>Ruminococcaceae_UCG002</i>        | 69     | 78      | 89      |
| <i>Ruminococcaceae_NK4A214_group</i> | 57     | 56      | 62      |
| <i>Ruminiclostridium_9</i>           | 60     | 78      | 72      |
| <i>Ruminiclostridium_5</i>           | 86     | 78      | 89      |
| <i>Roseburia</i>                     | 63     | 89      | 81      |
| <i>Romboutsia</i>                    | 71     | 78      | 77      |
| <i>Prevotella_6</i>                  | 40     | 67      | 60      |
| <i>Prevotella</i>                    | 86     | 100     | 79      |
| <i>Porphyromonas</i>                 | 83     | 89      | 77      |
| <i>Peptoniphilus</i>                 | 91     | 89      | 91      |
| <i>Parasutterella</i>                | 40     | 67      | 55      |
| <i>Parabacteroides</i>               | 77     | 89      | 89      |
| <i>Oscillibacter</i>                 | 66     | 89      | 74      |
| <i>Odoribacter</i>                   | 71     | 78      | 79      |
| <i>Murdochiella</i>                  | 69     | 78      | 57      |
| <i>Mobiluncus</i>                    | 74     | 89      | 62      |
| <i>Lawsonella</i>                    | 89     | 89      | 60      |
| <i>Lactobacillus</i>                 | 71     | 78      | 55      |
| <i>Lachnospiraceae_NK4A136_group</i> | 66     | 78      | 87      |
| <i>Lachnospiraceae_ND3007_group</i>  | 63     | 67      | 66      |
| <i>Lachnospiraceae_FCS020_group</i>  | 57     | 44      | 70      |
| <i>Lachnospira</i>                   | 69     | 89      | 77      |
| <i>Lachnoclostridium</i>             | 77     | 89      | 87      |
| <i>Intestinibacter</i>               | 51     | 89      | 58      |
| <i>Fusicatenibacter</i>              | 69     | 89      | 81      |
| <i>Flavonifractor</i>                | 43     | 78      | 58      |
| <i>Finegoldia</i>                    | 94     | 100     | 83      |
| <i>Family_XIII_AD3011_group</i>      | 46     | 78      | 72      |
| <i>Faecalibacterium</i>              | 86     | 78      | 96      |
| <i>Ezakiella</i>                     | 83     | 89      | 89      |
| <i>EscherichiaShigella</i>           | 83     | 100     | 98      |
| <i>Erysipelotrichaceae_UCG003</i>    | 69     | 67      | 74      |
| <i>Dorea</i>                         | 94     | 89      | 89      |
| <i>Dialister</i>                     | 83     | 100     | 75      |
| <i>Corynebacterium_1</i>             | 74     | 78      | 42      |
| <i>Coprococcus_3</i>                 | 80     | 56      | 79      |
| <i>Coprococcus_1</i>                 | 74     | 67      | 72      |
| <i>Collinsella</i>                   | 83     | 78      | 81      |
| <i>Clostridium_sensu_stricto_1</i>   | 49     | 56      | 68      |
| <i>Christensenellaceae_R7_group</i>  | 60     | 67      | 92      |
| <i>Campylobacter</i>                 | 89     | 78      | 75      |
| <i>Butyricoccus</i>                  | 69     | 89      | 75      |
| <i>Blautia</i>                       | 97     | 89      | 94      |
| <i>Bilophila</i>                     | 49     | 56      | 66      |
| <i>Bifidobacterium</i>               | 94     | 100     | 89      |
| <i>Bacteroides</i>                   | 97     | 100     | 98      |
| <i>Anaerostipes</i>                  | 77     | 89      | 81      |
| <i>Anaerococcus</i>                  | 91     | 100     | 85      |
| <i>Alistipes</i>                     | 83     | 89      | 94      |
| <i>Agathobacter</i>                  | 91     | 78      | 81      |

Occurrence was expressed as percentage of samples with presence of each genera within a delivery mode group. VA (vaginal delivery), ECS (emergency C-section), CS (elective C-section).
